# Supplementary material for: Feasibility Study Comparing Physical Activity Classifications from Accelerometers with Wearable Camera Data
Source: Int J Environ Res Public Health. 2020 Dec 13;17(24):9323. doi: 10.3390/ijerph17249323 (PMC7764508; doi:10.3390/ijerph17249323)
Supplement: Supplementary file 1 [file ijerph-17-09323-s001.pdf]

**Supplementary Table S1.** Agreement between camera and accelerometer data by means (95% CI), equivalence testing, intraclass correlation coefficient and Spearman's rho,  $n = 636$  person-hours,  $n = 53$  participants.

| Episode   | Mean (95% CI)<br>Camera (min/h) <sup>1</sup> | Mean (95% CI)<br>Accelerometer<br>(min/h) <sup>2</sup> | Accelerometer<br>Region of<br>Equivalence <sup>3</sup> | Equivalence<br>Test $t$ -Value <sup>3</sup> | Equivalence<br>Test $p$ -<br>Value <sup>3</sup> | ICC (95% CI) <sup>4</sup> | Correlation<br>(Spearman's) | Correlation<br>(Spearman's)<br>$p$ -Value |
|-----------|----------------------------------------------|--------------------------------------------------------|--------------------------------------------------------|---------------------------------------------|-------------------------------------------------|---------------------------|-----------------------------|-------------------------------------------|
| Sedentary | 34 (29,39)                                   | 19 (16,22)                                             | 17, 21                                                 | 26.8                                        | 1.00                                            | 0.74 (0.70,0.78)          | 0.66                        | <0.001                                    |
| Light     | 18 (13,23)                                   | 30 (28,32)                                             | 27 ,33                                                 | -21.0                                       | 1.00                                            | 0.39 (0.29,0.48)          | 0.27                        | <0.001                                    |
| MVPA      | 5 (2,8)                                      | 11 (8,14)                                              | 10, 12                                                 | -16.7                                       | 1.00                                            | 0.64 (0.58,0.69)          | 0.55                        | <0.001                                    |

<sup>1</sup>Coded using the 2011 Compendium of Physical Activities (Compendium) [16]. Camera captures images approximately every 30-s i.e., the first two images every minute were included in the analysis

<sup>2</sup>Using Freedson (1998) cut-points [11]. Counts per minute (CPM); Sedentary 0 – 99; Light 100 – 1951; Moderate-to-vigorous physical activity (MVPA)  $\geq 1952$  <sup>3</sup>Equivalence testing was conducted using two one sided  $t$  tests <sup>4</sup>Intraclass correlation coefficient (ICC, two way mixed; consistency);  $p < 0.05$  considered statistically significant. CI indicates confidence interval.
